# Supplementary material
Source: HighWire-hosted journal article supplement (https://erj.ersjournals.com/content/53/3/1801523)
Supplement: inline-supplementary-material-1 [file inline-supplementary-material-1.pdf]

## Online Supplement

### Supplemental Methods

#### *Mice*

All mice were housed in specific pathogen free (SPF) facilities where housing and experimentation was carried out in accordance with the Animal (Scientific Procedures) Act 1986 and current guidelines approved by the Queen's University Ethical Review Committee. The animals were maintained on a 12 hr cycle of light followed by 12 hr cycle of darkness with free access to chow and water.  $\beta$ ENaC-Tg mice were generated as previously described [1] and backcrossed on to the C57Bl/6 background [2]. Cathepsin S (CatS)<sup>-/-</sup> mice were generated as previously described [3] and were intercrossed with  $\beta$ ENaC-Tg mice for five generations to generate the double mutant CatS<sup>-/-</sup> $\beta$ ENaC-Tg mice. The above-mentioned breeding programs generated four genotypes of mice for investigation;  $\beta$ ENaC-Tg mice, WT littermates, CatS<sup>-/-</sup> mice and CatS<sup>-/-</sup> $\beta$ ENaC-Tg mice. Offspring from all the breeding programs were genotyped by PCR and mice were studied at day 14. For CatS instillation experiments, C57Bl/6 mice were purchased from Charles River Laboratories (UK).

#### *In vivo targeting of cathepsin S and PAR-2*

VBY-999 was provided by Virobay Inc, Menlo Park, California, USA. VBY-999 is a selective and reversible inhibitor of CatS with an inhibition constant  $K_{iapp}$  of 290 pM on the purified human CatS enzyme and 690 pM on mouse CatS [4]. VBY-999 demonstrates over 3,000-fold selectivity versus the other related cathepsins such as K, L, B, and F and has no detectable activity against other cysteine, serine, and aspartyl proteases tested [4]. FSLLRY-NH<sub>2</sub> is a selective PAR-2 peptide antagonist (R&D Systems, Abingdon, UK) prepared in sterile distilled

water. Newborn  $\beta$ ENaC-Tg mice and WT littermates were dosed once daily for 14 days via a subcutaneous injection of either VBY (100 mg/kg), FSLLRY-NH<sub>2</sub> (4 mg/kg), dextrose solution or sterile water. Experiments were terminated 16 hr after the last subcutaneous treatment.

### ***Cathepsin S lung instillation***

C57Bl/6 female mice used in these experiments were purchased from Charles Rivers Laboratories. Under anaesthesia, recombinant human CatS (rhCatS; 5  $\mu$ g; Merck Millipore, Nottingham, UK) in sodium acetate buffer (pH 5.5) and buffer alone were intratracheally (IT) instilled with the aid of a blunted 24g IV catheter (BD Biosciences, UK) into the lungs of mice in a final volume of 50  $\mu$ l. To target PAR-2 in this model, WT mice were treated with the PAR-2 peptide antagonist FSLLRY-NH<sub>2</sub> (4 mg/kg) or sterile water vehicle control intraperitoneally 30 min prior to rhCatS or sodium acetate buffer control instillation (IT). Experiments were terminated 24 hr after IT instillation.

### ***Bronchoalveolar lavage fluid collection and differential cell staining***

Bronchoalveolar lavage (BAL) fluid was collected as previously described [1, 5]. Briefly, mice were terminally anesthetized with an intra-peritoneal injection of ketamine (Ketaset, Bayer) / xylazine (Rompum, Bayer) cocktail (120 mg/kg and 16 mg/kg, respectively). A blunted 26g needle was inserted through a small incision in the upper trachea and tied in place with 4.0 Mersilk silk sutures (Ethicon, Livingston, UK). BAL fluid was collected, centrifuged at 4 °C and the cell-free BAL fluid was stored at -80°C. Total cells counts were determined on BAL cell pellets by staining with trypan blue stain by counting on a haemocytometer. Differential cell counts were evaluated following cytospin preparations onto coated cytoslides (Shandon / Thermo Scientific, UK). Cells were stained with May-Grünwald Giemsa stains (VWR,

Leicestershire, UK) and visualized on the Leica DM5500B microscope. Images were captured using the image analysis Leica AL software, (version 3.7) under X 40 objective lens. Histological cell counts were conducted on each cytopsin with at least 400 cells counted with the aid of the Image J software.

### ***Immunohistochemical staining for cathepsin S***

Paraffin-embedded tissue sections (6 µm) were de-paraffinized in two changes of HistoClear (Fisher Scientific, Leicestershire, UK) and an ethanol-to-water gradient consisting of absolute ethanol, 95% ethanol and 70% ethanol for 5 min each. The sections underwent antigen-retrieval (microwave: citrate buffer pH6) blocked with 10% horse serum for 1 hr at room temperature, then incubated overnight at 4°C with goat anti-CatS antibody (1:100 dilution) or an equivalent dilution of goat IgG. After washing in PBS-T, sections were incubated with an anti-goat secondary antibody followed by the avidin-biotin complex (ABC) conjugated with horseradish peroxidase (ABC kit, Vector Laboratories, Peterborough, UK) for 30 min at room temperature. CatS was detected using 3,3-diaminobenzidine (DAB) (Dako, Agilent Technologies, Cheshire, UK), followed by counterstaining with Harris haematoxylin solution for 3 min. The sections were washed in running tap water and blued in 0.2% ammonia water. After rinsing in tap water, the sections were de-hydrated through a water-to-ethanol gradient consisting of 70% ethanol, 95% ethanol and absolute ethanol for 5 min each. Following two changes of HistoClear, the slides were finally mounted in DPX mounting media and visualised using a Leica DM5500B microscope. Images were captured using the Leica AL image software (Version 3.7).

### ***Histological and morphometric analyses***

After BAL fluid collection, the lungs were inflated with 10% buffered formalin (Sigma-Aldrich, Dorset, UK) to 25 cm of fixative pressure. Lungs were histologically processed, sectioned to 6  $\mu\text{m}$  thickness and stained with haematoxylin and eosin stain for mean linear intercept (chord) length ( $L_m$ ) which is a measurement of distal airspace enlargement as previously described [6]. Briefly, histologic images from all the lobes were randomly visualised with the Leica DM5500B microscope and images captured using the image analysis Leica AL software (Version 3.7) under X 20 objective lens. With the aid of Image J and line tool, the mean linear intercept length was assessed by dividing the sum of the lengths of all lines in all frames by the number of intercepts between alveolar septi and counting lines, as previously described [6–9]. For each animal, a minimum of 200 intercepts sampled in 5 fields of view from different lobes were measured. Additionally, alveolar septal destruction was determined in the lung sections as destructive indices using a grid of points (42-point grid) overlying images of lung sections and Image J analysis software. Points were classified to lie within destructed (D) or intact (N, normal) alveolar ducts in the lung parenchyma and the destructive index (DI) was calculated by  $DI = 100 \times D / (D + N)$  as previously described [10, 11]. For each animal, a minimum of 210 points was sampled and classified in 5 fields in different lobes.

#### ***Alcian Blue-Periodic Acid Schiff (AB-PAS) staining***

Paraffin-embedded, serially sectioned (6  $\mu\text{m}$ ) lung tissue sections were de-paraffinized in two changes of Histoclear (Fisher Scientific, Leicestershire, UK), followed by re-hydration in ethanol-to-water gradient, which consisted of absolute alcohol, 95% alcohol and 70% alcohol for 5 min each. The tissue sections were washed briefly in distilled water and stained in Alcian blue solution (Sigma-Aldrich) for 30 min. The lung tissue sections were gently rinsed in running tap water for 1 min and placed into distilled water prior to the 5 min incubation in Periodic

acid (0.5%, Sigma-Aldrich). The sections were then washed in two quick changes in distilled water and incubated in Schiffs reagent (Merck, Nottingham, UK) for 15 min. Slides were briefly dipped into distilled water and de-hydrated in two changed of 95% alcohol and absolute alcohol for 2 min each. Slides were cleared in two changes of Histoclear and finally mounted in DPX mounting media (Sigma-Aldrich). All imaging was carried out on Leica DM5500B microscope and captured using the image analysis software Leica AL software and quantified using ImageJ analysis. Percentage mucus volume was established in the non-inflated left lungs from the same mice used for MLI and DI measurements. Intraluminal airway mucus was measured by assessing the percentage content of AB-PAS positive mucosal material per surface area of the airway lumen.

#### ***Goblet and mucus producing cell quantification***

Goblet cells and mucus producing cells were quantified from AB-PAS stained lung sections imaged at x20 objective. Goblet cells were defined as having a height of more than a third of the epithelial height and lying at least part epithelial. Mucus producing cells include goblet cells and pre-goblet cells. Pre-goblet cells are AB-PAS positive cells not falling into the goblet cell criteria, typically only an apical streak. The length of the basement membrane was measured and counts were expressed as cells/mm basement membrane.

#### ***Cathepsin S activity assay***

CatS activity in BAL fluid from 2 week old WT and  $\beta$ ENaC-Tg was determined using the substrate Z-Phe-Arg-7-amido-4-methylcoumarin, Hydrochloride (FR-AMC; Merck) as previously described [12]. Fluorescence (substrate turnover) was determined by excitation at 360 nm and emission at 460 nm in a 96-well microplate reader (Synergy HT using Gen5™

software, BioTek UK, Swindon). Results are expressed as the change ( $\Delta$ ) in relative fluorescence units ( $\Delta$ RFU) over a 60 min period.

### ***ELISAs***

BAL fluid KC (R&D Systems) and desmosine (Cusabio, Wuhan, China) levels were quantified as per the manufacturer's instructions.

### ***BCA assay***

BAL fluid total protein concentrations were determined using the BCA method (Pierce BCA Assay, Thermo Scientific) as per the manufacturer's instructions.

### ***Western Blotting***

Denatured lung lysate or BAL fluid samples were separated on 12% SDS-PAGE gels and transferred onto nitrocellulose membrane (GE Healthcare, Buckinghamshire, UK). Membranes were blocked and incubated with anti-CD74 (BD Biosciences, Oxford, UK), anti-CatS (R&D Systems) and  $\gamma$ -tubulin (Sigma-Aldrich) overnight at 4°C. Membranes were washed and incubated with HRP-conjugated secondary antibodies for 1 hr at RT. Following further washing, membranes were developed using chemiluminescent substrate (Western Lightning, PerkinElmer, Coventry, UK) and viewed using Syngene G:Box and GeneSnap software (Syngene, Cambridge, UK).

### ***Real-Time RT-PCR***

Total RNA was extracted from mouse lungs using TRI Reagent® (Sigma-Aldrich) as per manufacturer's instructions. Gene expression was analysed by real-time polymerase chain reaction using inventoried TaqMan® gene expression assays for Muc5ac (Mm01276718\_m1), Muc5B (Mm00466391\_m1), Gob5 (Mm01320697\_m1) and GAPDH (Mm99999915\_g1) according to manufacturer's instructions (Applied Biosystems, Thermo Fisher Scientific). The expression of target genes relative to GAPDH was determined using the  $2(-\Delta\Delta Ct)$  method.

### **Statistics**

All data were analysed using GraphPad Prism 5.0 (GraphPad Software Inc., San Diego, CA). Data are presented as mean  $\pm$  SEM. Means were compared by unpaired *t*-test, Mann Whitney test, one-way analysis of variance (ANOVA) or Kruskal-Wallis test as appropriate.  $P < 0.05$  was accepted to indicate statistical significance. Survival curves were compared using Kaplan-Meier log rank analysis.

### **References**

1. Mall M, Grubb BR, Harkema JR, O'Neal WK, Boucher RC. Increased airway epithelial Na<sup>+</sup> absorption produces cystic fibrosis-like lung disease in mice. *Nat. Med.* 2004; 10: 487–493.
2. Johannesson B, Hirtz S, Schatterny J, Schultz C, Mall MA. CFTR regulates early pathogenesis of chronic obstructive lung disease in  $\beta$ ENaC-overexpressing mice. Vij N, editor. *PLoS One* 2012; 7: e44059.
3. Shi GP, Villadangos JA, Dranoff G, Small C, Gu L, Haley KJ, Riese R, Ploegh HL, Chapman HA. Cathepsin S required for normal MHC class II peptide loading and germinal center development. *Immunity* 1999; 10: 197–206.
4. Sevenich L, Bowman RL, Mason SD, Quail DF, Rapaport F, Elie BT, Brogi E, Brastianos PK, Hahn WC, Holsinger LJ, Massagué J, Leslie CS, Joyce JA. Analysis of tumour- and stroma-supplied proteolytic networks reveals a brain-metastasis-promoting role for cathepsin S. *Nat. Cell Biol.* 2014; 16: 876–888.
5. Small DMDM, Zani M-LM-L, Quinn DJDJ, Dallet-Choisy S, Glasgow AMAAMA, O'Kane

- C, McAuley DFDF, McNally P, Weldon S, Moreau T, Taggart CCCC. A functional variant of elafin with improved anti-inflammatory activity for pulmonary inflammation. *Mol. Ther.* 2015; 23: 24–31.
6. Hsia CCW, Hyde DM, Ochs M, Weibel ER, ATS/ERS Joint Task Force on Quantitative Assessment of Lung Structure. An official research policy statement of the American Thoracic Society/European Respiratory Society: standards for quantitative assessment of lung structure. *Am. J. Respir. Crit. Care Med.* 2010; 181: 394–418.
  7. Dunnill MS. Quantitative methods in the study of pulmonary pathology. *Thorax* 1962; 17: 320–328.
  8. Mall MA, Harkema JR, Trojanek JB, Treis D, Livraghi A, Schubert S, Zhou Z, Kreda SM, Tilley SL, Hudson EJ, O’Neal WK, Boucher RC. Development of chronic bronchitis and emphysema in beta-epithelial Na<sup>+</sup> channel-overexpressing mice. *Am. J. Respir. Crit. Care Med.* American Thoracic Society; 2008; 177: 730–742.
  9. Knudsen L, Weibel ER, Gundersen HJG, Weinstein F V, Ochs M. Assessment of air space size characteristics by intercept (chord) measurement: an accurate and efficient stereological approach. *J. Appl. Physiol.* 2010; 108: 412–421.
  10. Saetta M, Shiner RJ, Angus GE, Kim WD, Wang NS, King M, Ghezzi H, Cosio MG. Destructive index: a measurement of lung parenchymal destruction in smokers. *Am. Rev. Respir. Dis.* 1985; 131: 764–769.
  11. Trojanek JB, Cobos-Correa A, Diemer S, Kormann M, Schubert SC, Zhou-Suckow Z, Agrawal R, Duerr J, Wagner CJ, Schatterny J, Hirtz S, Sommerburg O, Hartl D, Schultz C, Mall MA. Airway mucus obstruction triggers macrophage activation and matrix metalloproteinase 12-dependent emphysema. *Am. J. Respir. Cell Mol. Biol.* American Thoracic Society; 2014; 51: 709–720.
  12. Weldon S, McNally P, McAuley DF, Oglesby IK, Wohlford-Lenane CL, Bartlett JA, Scott CJ, McElvaney NG, Greene CM, McCray PB, Taggart CC. miR-31 Dysregulation in Cystic Fibrosis Airways Contributes to Increased Pulmonary Cathepsin S Production. *Am. J. Respir. Crit. Care Med.* 2014; 190: 165–174.



## Supplemental Figures

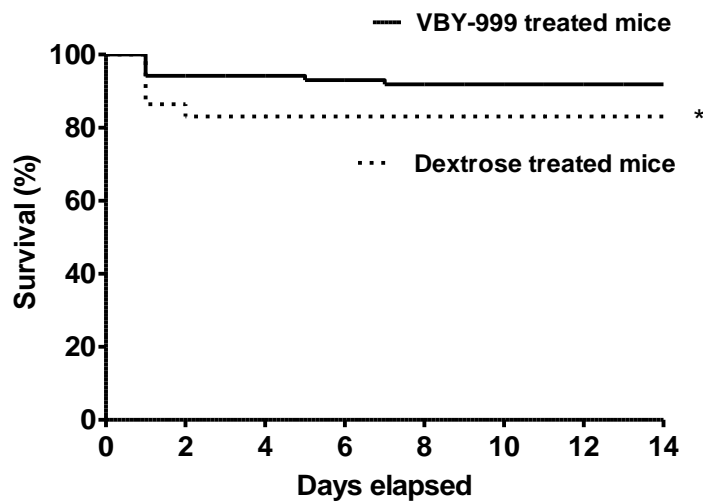

**Figure S1. Inhibition of CatS increases the survival of  $\beta$ ENaC-Tg mice.**

Kaplan-Meier survival curve of  $\beta$ ENaC-Tg mice treated with vehicle (5% dextrose, n = 118) or the CatS inhibitor (VBY-999, 100 mg/kg; n = 103) by subcutaneous injection every day from birth for 14 days. \* P = 0.0482, Log-rank (Mantel-Cox) test.

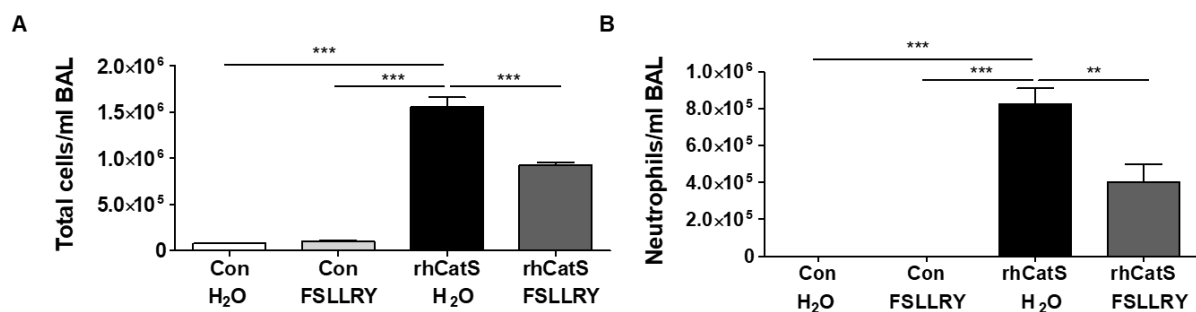

**Figure S2. PAR-2 inhibition reduces CatS-induced airway inflammation in WT mice.**

WT mice were treated with the PAR-2 peptide antagonist FSLLRY-NH<sub>2</sub> (4 mg/kg) or sterile water vehicle control (H<sub>2</sub>O) intraperitoneally 30 min prior to CatS (rhCatS, 5  $\mu$ g) or sodium acetate buffer control (Con) intratracheal instillation. After 24 hr, BAL fluid was collected and (A) total cells and (B) neutrophil cell counts were quantified. n = 4-7 per group. \*\* P < 0.01, \*\*\* P < 0.001.
